# Supplementary material for: Mycobacterium tuberculosis Reactivates HIV-1 via Exosome-Mediated Resetting of Cellular Redox Potential and Bioenergetics
Source: PubMed Central journal article supplement (PMC7064780; doi:10.1128/mbio.03293-19), 2020-03-03

**A**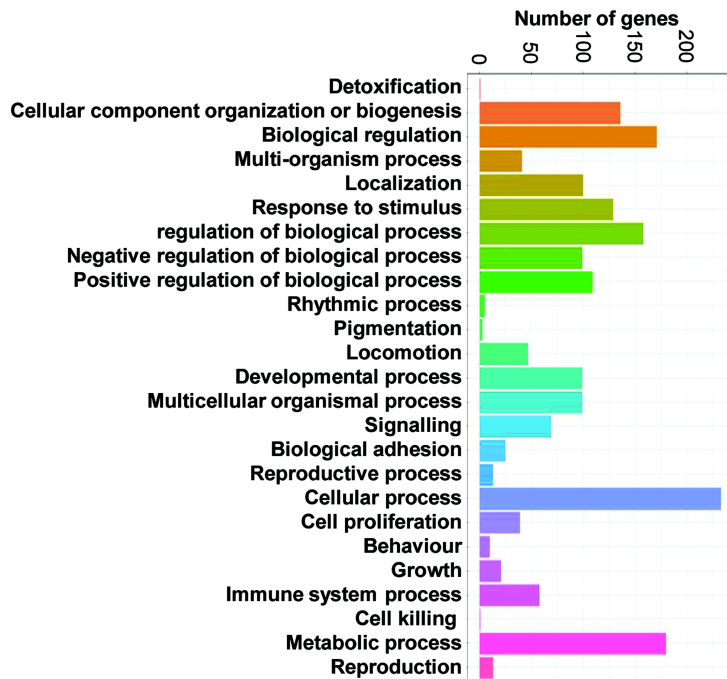**B**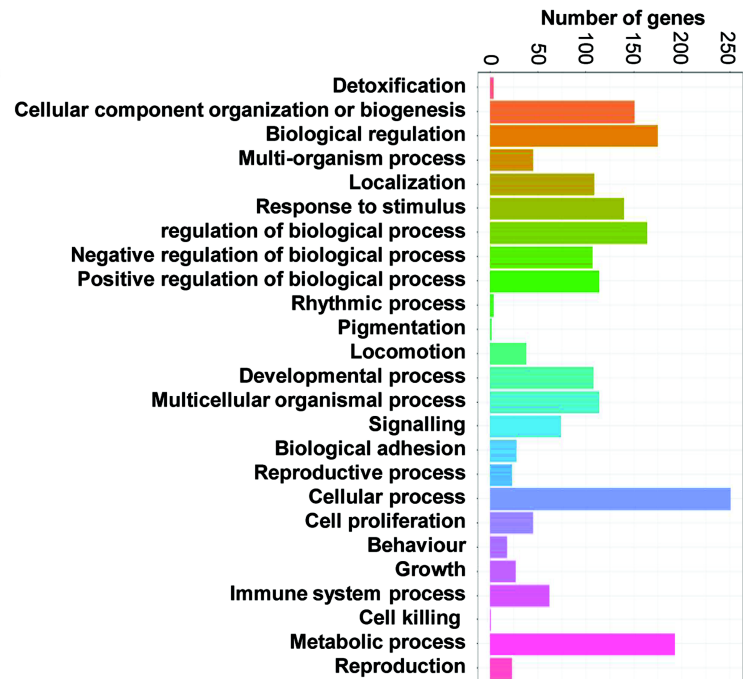**C**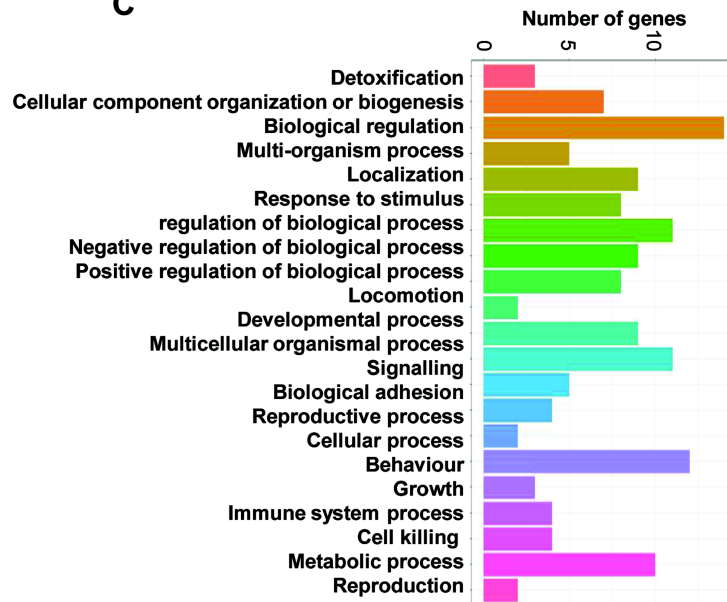

Supplement: mBio.03293-19-sf004.pdf [file mBio.03293-19-sf004.pdf]
